# Supplementary material for: Effects of JAK1-Preferential Inhibitor Filgotinib on Circulating Biomarkers and Whole Blood Genes/Pathways of Patients With Moderately to Severely Active Crohn’s Disease
Source: PubMed Central journal article supplement — Inflamm Bowel Dis. 2021 Nov 6;28(8):1207–18. doi: 10.1093/ibd/izab253 (PMC9340524; doi:10.1093/ibd/izab253), 2021-11-06
Supplement: izab253_suppl_supplementary_table_1.pdf [file izab253_suppl_supplementary_table_1.pdf]

Supplementary Table 1. Biomarker panels and assay method

| Assay                         | Testing Lab        | Specimen Type | Time points     | Biomarker*                                                                                         | Note                                 |
|-------------------------------|--------------------|---------------|-----------------|----------------------------------------------------------------------------------------------------|--------------------------------------|
| ELISA                         | Pacific Biomarkers | Serum         | BL, W2, W4, W10 | IL-6 (0), IL-8 (0), VEGFA (0), SAA (0), GP130 (0), Serum CALP (0), IL-10 (1), IFNg (5), IL-17A (6) | Included in analysis                 |
|                               |                    |               |                 | IL-1B (37), IL-4 (40), IL-1A (42), TNFa (42), IL-12p70 (69), IL-23 (89)                            | Excluded; >10% of samples below LLOQ |
| ELISA                         | ABL                | Serum         | BL, W2, W4, W10 | TGFb1 (0), IL-22 (0), Eotaxin (2)                                                                  | Included in analysis                 |
|                               |                    |               |                 | FGF2 (41), GM-CSF (53), IL-17E (95)                                                                | Excluded; >10% of samples below LLOQ |
|                               |                    |               |                 | IL-9^, IL-33^, IL-21^                                                                              | Assays failed qualification          |
| ELISA                         | Nordic             | Serum         | BL, W2, W4, W10 | C3M (0), C4M (0), Pro-C3 (3)                                                                       | Included in analysis                 |
| ELISA                         | Gilead             | Serum         | BL, W2, W4, W10 | OSM (0)                                                                                            | Included in analysis                 |
|                               |                    |               |                 | sIL-6/IL-6R (43)                                                                                   | Excluded; >10% of samples below LLOQ |
| Colorimetry / BCG dye binding | Central Lab        | Serum         | BL, W2, W4, W10 | Albumin^                                                                                           | Included in analysis                 |
| Immunturbidimetry             | Central Lab        | Serum         | BL, W2, W4, W10 | CRP^                                                                                               | Included in analysis                 |
| Spectrophotometry             | Central Lab        | Serum         | BL, W2, W4, W10 | Hemoglobin^                                                                                        | Included in analysis                 |
| RNA-seq                       | EA/Q2              | Whole blood   | BL, W10         | Whole transcriptome^                                                                               | Included in analysis                 |

\* Number in parentheses is the % of samples < LLOQ

^ LLOQ information not available or not applicable

BL, baseline; W, Week
