# Supplementary material for: Effects of JAK1-Preferential Inhibitor Filgotinib on Circulating Biomarkers and Whole Blood Genes/Pathways of Patients With Moderately to Severely Active Crohn’s Disease
Source: PubMed Central journal article supplement — Inflamm Bowel Dis. 2021 Nov 6;28(8):1207–18. doi: 10.1093/ibd/izab253 (PMC9340524; doi:10.1093/ibd/izab253), 2021-11-06
Supplement: izab253_suppl_supplementary_table_2.pdf [file izab253_suppl_supplementary_table_2.pdf]

**Supplementary Table 2. Patient demographics, baseline characteristics and clinical response by analysis set**

| Metric*                                   | Full Randomized Set |                       | Biomarker Analysis Set |                       | RNA-Seq Analysis Set <sup>^</sup> |                      | P-value <sup>+</sup> |            |
|-------------------------------------------|---------------------|-----------------------|------------------------|-----------------------|-----------------------------------|----------------------|----------------------|------------|
|                                           | Placebo<br>(n=44)   | Filgotinib<br>(n=130) | Placebo<br>(n=42)      | Filgotinib<br>(n=126) | Placebo<br>(n=29)                 | Filgotinib<br>(n=72) | Placebo              | Filgotinib |
| <b>Age</b>                                | 33 [27, 41]         | 36 [29, 44]           | 32 [27, 41]            | 36 [29, 42]           | 34 [28, 41]                       | 36 [29, 42]          | 0.987                | 0.994      |
| <b>Sex (%)</b>                            | M 41%,<br>F 59%     | M 45%,<br>F 55%       | M 41%, F<br>59%        | M 44%,<br>F 56%       | M 31%,<br>F 69%                   | M 43%,<br>F 57%      | 0.651                | 0.950      |
| <b>Exposed to anti-TNF-a,<br/>n(%)</b>    | 28 (64%)            | 77 (59%)              | 26 (62%)               | 73 (58%)              | 18 (62%)                          | 37 (51%)             | 0.984                | 0.540      |
| <b>Oral corticosteroids<br/>use, n(%)</b> | 23 (52%)            | 65 (50%)              | 22 (52%)               | 65 (52%)              | 17 (61%)                          | 33 (46%)             | 0.660                | 0.735      |
| <b>CRP (mg/L)</b>                         | 8.1 [3.6,<br>23.9]  | 8.2 [3.1,<br>16.9]    | 9.0 [3.6,<br>25.4]     | 8.2 [3.0,<br>17.1]    | 5.3 [2.7,<br>11.7]                | 8.2 [2.7,<br>16.8]   | 0.643                | 0.755      |
| <b>CRP&gt;10mg/L, n(%)</b>                | 20 (45%)            | 53 (41%)              | 20 (48%)               | 51 (41%)              | 9 (31%)                           | 28 (39%)             | 0.339                | 0.964      |
| <b>Disease duration<br/>(years)</b>       | 5.4<br>[3.1, 10.2]  | 6.2 [3.2,<br>11.5]    | 5.4 [3.3,<br>10.3]     | 6.2 [3.0,<br>11.5]    | 5.7 [2.2,<br>10.2]                | 6.2 [3.1,<br>13.0]   | 0.999                | 0.998      |
| <b>SES-CD</b>                             | 14 [10, 21]         | 12 [10, 19]           | 15 [11, 22]            | 12 [10, 19]           | 15 [12,<br>21]                    | 12 [10, 19]          | 0.919                | 0.931      |
| <b>Endoscopic response,<br/>n(%)</b>      | 6 (17%)             | 32 (31%)              | 6 (18%)                | 31 (30%)              | 4 (14%)                           | 23 (33%)             | 0.913                | 0.908      |

\*Values are median [Q1, Q3] unless otherwise stated.

<sup>^</sup>64 patients included in the biomarker analysis set were not included in the RNA-Seq analysis set due to lack of sample availability. A further three patient samples were removed due to the data quality control checks.

<sup>+</sup>P-values were generated by comparing means of the three placebo data sets and comparing means of the three filgotinib data sets. One-way ANOVA was used for continuous variables and Chi-Square test was used for categorical variables
