# Supplementary material for: Effects of JAK1-Preferential Inhibitor Filgotinib on Circulating Biomarkers and Whole Blood Genes/Pathways of Patients With Moderately to Severely Active Crohn’s Disease
Source: PubMed Central journal article supplement — Inflamm Bowel Dis. 2021 Nov 6;28(8):1207–18. doi: 10.1093/ibd/izab253 (PMC9340524; doi:10.1093/ibd/izab253), 2021-11-06
Supplement: izab253_suppl_supplementary_table_3.pdf [file izab253_suppl_supplementary_table_3.pdf]

**Supplementary Table 3. Patient demographics, baseline characteristics and clinical response by exposure to anti-TNF $\alpha$  therapy: (A) RNA-seq Analysis Set; (B) Biomarker Analysis Set**

**A**

| Metric*                         | FIL                     |                        |                      | PBO                    |                        |                      |
|---------------------------------|-------------------------|------------------------|----------------------|------------------------|------------------------|----------------------|
|                                 | aTNFexpr (N=37)         | aTNFnaïve (N=35)       | P-value <sup>†</sup> | aTNFexpr (N=18)        | aTNFnaïve (N=11)       | P-value <sup>†</sup> |
| AGE                             | 36 [29.0,42.0]          | 38 [29.5,41.5]         | 0.657                | 40 [32.3,44.0]         | 28 [24.0,31.5]         | < 0.001              |
| Sex (%)                         | F (64.9%),<br>M (35.1%) | F (48.6%)<br>M (51.4%) | 0.163                | F (66.7%)<br>M (33.3%) | F (72.7%)<br>M (27.3%) | 0.732                |
| Oral corticosteroids use, n (%) | 16 (43.2%)              | 17 (48.6%)             | 0.65                 | 11 (61.1%)             | 7 (63.6%)              | 0.892                |
| CRP(mg/L)                       | 8.9 [3.1,16.8]          | 7.4 [2.3,16.6]         | 0.164                | 5.5 [3.8,20.3]         | 3.6 [0.9,8.1]          | 0.381                |
| CRP>10mg/L, n(%)                | 16 (43.2%)              | 13 (37.1%)             | 0.598                | 6 (33.3%)              | 2 (18.2%)              | 0.376                |
| Disease duration (years)        | 8.1 [4.3, 13.8]         | 4.5 [2.0,9.5]          | 0.02                 | 7.5 [4.2,10.4]         | 2.1 [1.0,5.5]          | 0.024                |
| SESCD                           | 13 [10.0,20.0]          | 11 [9.0,15.5]          | 0.233                | 15 [12.3, 20.3]        | 15 [12.5, 20.0]        | 0.891                |
| Endoscopic response, n (%)      | 13 (37.1%)              | 10 (28.6%)             | 0.445                | 2 (11.1%)              | 2 (18.2%)              | 0.592                |
| Anti-TNF $\alpha$ failed        | 35 (94.6%)              | -                      | -                    | 18 (100.0%)            | -                      | -                    |

\* Values are median [Q1, Q3] unless stated otherwise

<sup>†</sup>P-values were generated by comparing means of the anti-TNF-experienced and anti-TNF-naïve data subsets. One-way ANOVA was used for continuous variables and Chi-Square test was used for categorical variables

**B**

| Metric*                         | FIL                    |                        |                      | PBO                    |                        |                      |
|---------------------------------|------------------------|------------------------|----------------------|------------------------|------------------------|----------------------|
|                                 | aTNFexpr (N=73)        | aTNFnaïve (N=53)       | P-value <sup>†</sup> | aTNFexpr (N=26)        | aTNFnaïve (N=16)       | P-value <sup>†</sup> |
| AGE                             | 36 [29.0,42.0]         | 39 [29.0,48.0]         | 0.208                | 35 [28.0,43.3]         | 29.5 [25.8,34.5]       | 0.194                |
| Sex (%)                         | F (60.3%)<br>M (39.7%) | F (49.1%)<br>M (50.9%) | 0.211                | F (53.8%)<br>M (46.2%) | F (68.8%)<br>M (31.2%) | 0.339                |
| Oral corticosteroids use, n (%) | 38 (52.1%)             | 27 (50.9%)             | 0.902                | 14 (53.8%)             | 8 (50.0%)              | 0.808                |
| CRP(mg/L)                       | 8.9 [3.7,19.1]         | 6.6 [2.0,16.3]         | 0.41                 | 15.4 [5.2,30.9]        | 7.0 [1.8,9.9]          | 0.05                 |
| CRP>10mg/L, n(%)                | 33 (45.2%)             | 21 (39.6%)             | 0.532                | 14 (53.8%)             | 4 (25.0%)              | 0.067                |
| Disease duration (years)        | 7.9 [4.6,13.3]         | 3.6 [1.2,6.5]          | < 0.001              | 6.5 [4.0,10.5]         | 2.7 [0.8,4.9]          | 0.007                |
| SESCD                           | 14 [10.0,20.0]         | 11 [9.0,15.0]          | 0.053                | 14 [11.3, 21.0]        | 15.5 [10.8,22.2]       | 0.72                 |
| Endoscopic response, n (%)      | 18 (30.0%)             | 13 (29.5%)             | 0.96                 | 3 (15.0%)              | 3 (21.4%)              | 0.628                |

|                         |            |   |   |             |   |   |
|-------------------------|------------|---|---|-------------|---|---|
| <b>Anti-TNFa failed</b> | 69 (94.5%) | - | - | 26 (100.0%) | - | - |
|-------------------------|------------|---|---|-------------|---|---|

\* Values are median [Q1, Q3] unless stated otherwise

†P-values were generated by comparing means of the anti-TNF-experienced and anti-TNF-naïve data subsets. One-way ANOVA was used for continuous variables and Chi-Square test was used for categorial variables
